# Supplementary material for: The Differential Expression of Mevalonate Pathway Genes in the Gut of the Bark Beetle Dendroctonus rhizophagus (Curculionidae: Scolytinae) Is Unrelated to the de Novo Synthesis of Terpenoid Pheromones
Source: MDPI journal article supplement (doi:10.3390/ijms20164011), 2019-08-17
Supplement: s1 [file s1]

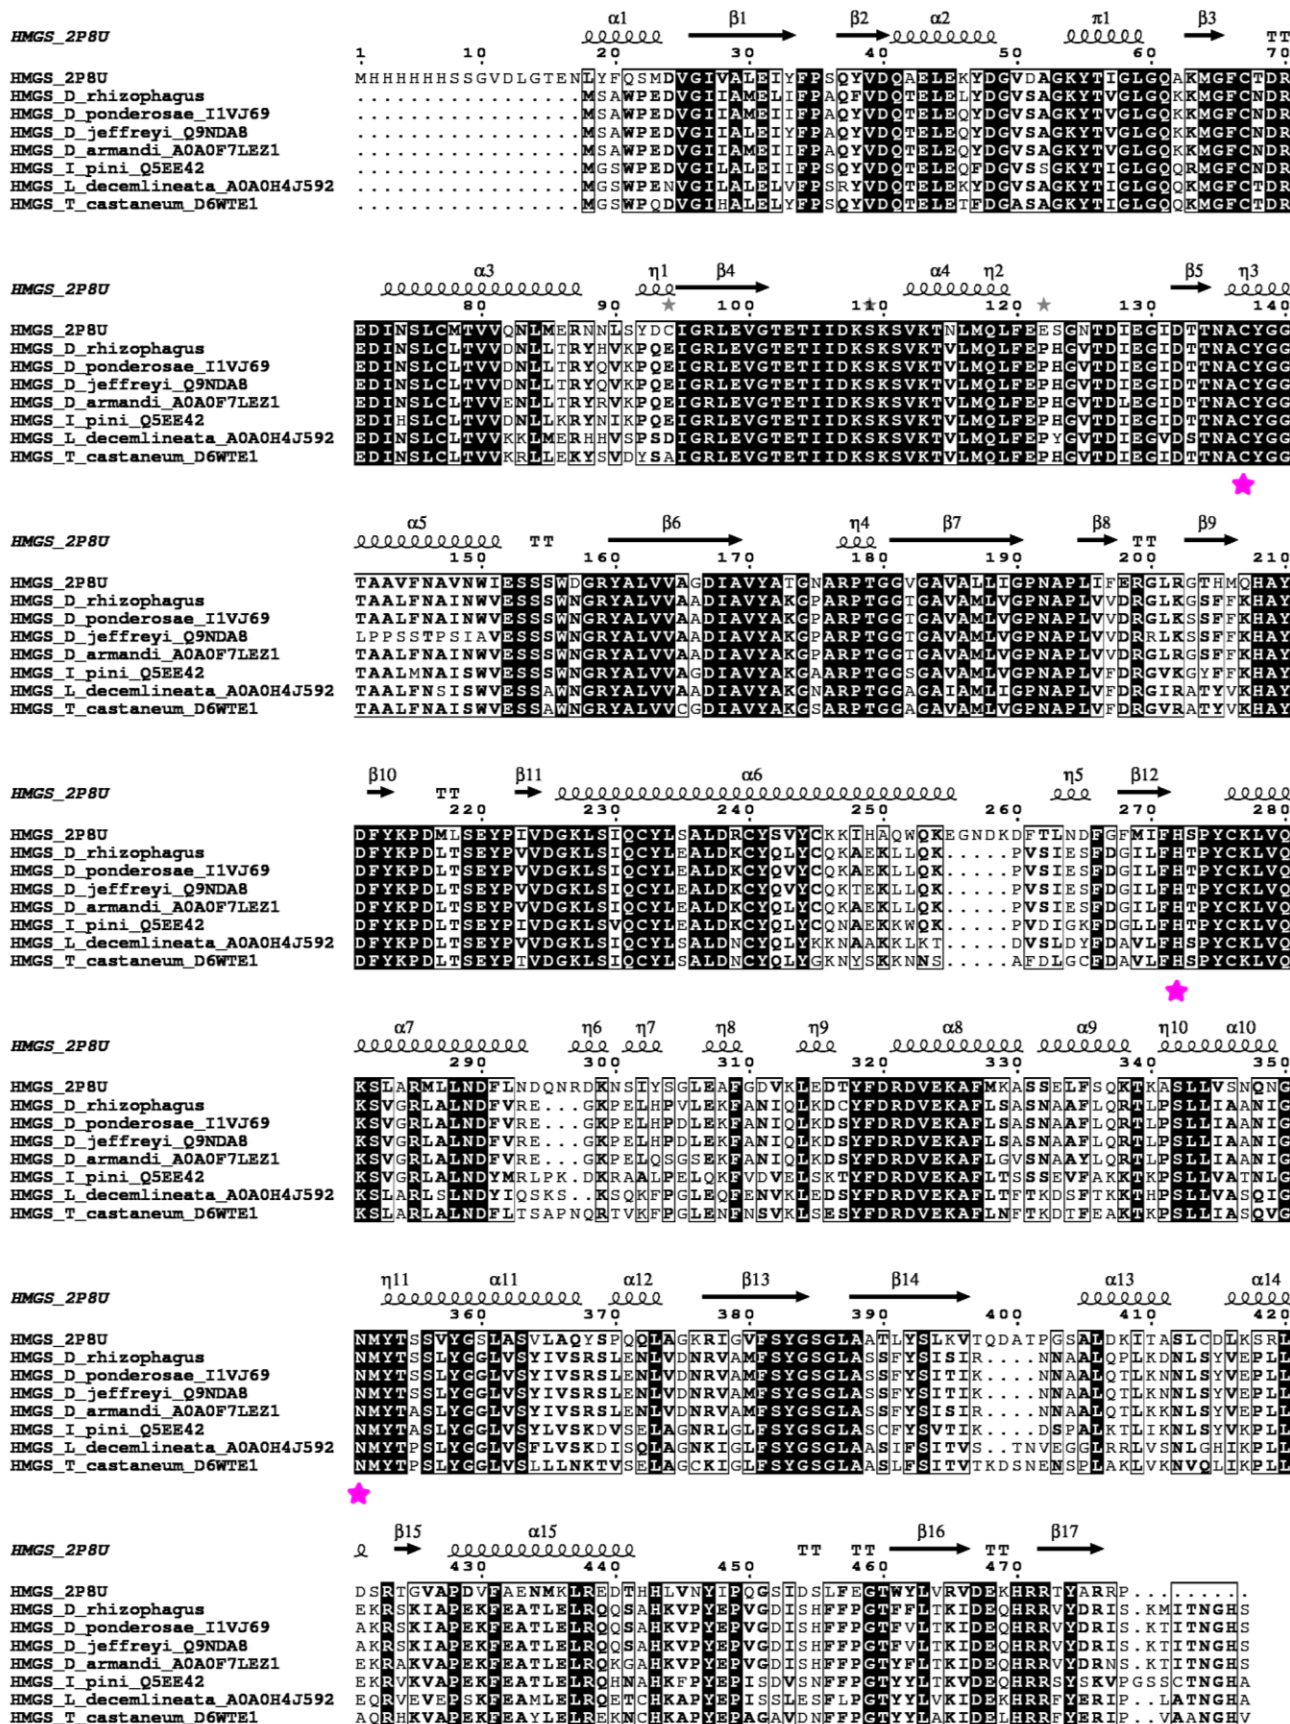

**Figure S2.** Multiple sequence alignment and assignment of secondary structure elements to 3-hydroxy-3-methylglutaryl-CoA synthase (HMGS) by ESPrnt 3.0, according to the *Homo sapiens* protein structure (PDB: 2P8U). The multiple alignments included genus *Dendroctonus* and other coleopteran sequences. Conserved amino acids involved in the catalytic activity (★) were manually tagged according to previous studies [109] and ExPASy-PROSITE server (<http://prosite.expasy.org/>).



# HMGR\_1DQ8

HMGR\_1DQ8  
 HMGR\_D\_rhizophagus  
 HMGR\_D\_ponderosae\_U5ZZ40  
 HMGR\_D\_jeffreyi\_Q9N6G8  
 HMGR\_D\_armandi\_A0A0F7LG51  
 HMGR\_I\_paraconfusus\_Q9XY99  
 HMGR\_I\_pini\_Q95WT1  
 HMGR\_L\_decemlineata\_A0A0H4ISG3  
 HMGR\_T\_castaneum\_A0A139WIA9

```

MTSRLFRVHGEFCTNHPWEVIVATLTTLTACMLTVEQPPPLRPSKPAIKSCLGCIQEA EYNAADLISM TIL
MASRLFRVHGEFCTNHPWEVIVATLTTLTACMLTVEQPPPLRPTKPTIKSCLGCIQEA EYNAADLISM TIL
MASRLFRVHGEFCTNHPWEVIVATLTTLTACMLTVEQPPPLRPTKPTIKSCLGCIQEA EYNAADLISM TIL
MVSRLFLAHGEFCTNHPWEVIVATLTTLTACMLTVEQPPPLRPTKPTIKSCLGCIQEA EYNAADLISM TIL
MVSRLFLAHGEFCTNHPWEVIVATLTTLTACMLTVEQPPPLRPTKPTIKSCLGCIQEA EYNAADLISM TIL
MSARFFYAHGEFCA SHPWEVIVATLTTLTACMLTVDQHPAPPKPKVIRFCIGCLHEAEYNAADVIVMTII
MTLRLFRAHGEFCA THPWEVIVATLTTLTACMLTVDQHPAPPKPKVIRFCIGCLHEAEYNAADLIVMTII

```

# HMGR\_1DQ8

HMGR\_1DQ8  
 HMGR\_D\_rhizophagus  
 HMGR\_D\_ponderosae\_U5ZZ40  
 HMGR\_D\_jeffreyi\_Q9N6G8  
 HMGR\_D\_armandi\_A0A0F7LG51  
 HMGR\_I\_paraconfusus\_Q9XY99  
 HMGR\_I\_pini\_Q95WT1  
 HMGR\_L\_decemlineata\_A0A0H4ISG3  
 HMGR\_T\_castaneum\_A0A139WIA9

```

RSLAVLYCYYQFRKMHKLGSKYILGIAGLFTVFSSLVFTTTVLNLLRIKVSDDLKDAIFFFLLLDLSKAA
RSLAVLYCYYQFRKMHKLGSKYVILGIAGLFTVFSSLVFTTTVLNLLRIKVSDDLKDAIFFFLLLDLSKAA
RSLAVLYCYYQFRKMHKLGSKYVILGIAGLFTVFSSLVFTTTVLNLLRIKVSDDLKDAIFFFLLLDLSKAA
RSLAVLYCYYQFRKMHKLGSKYILGIAGVFTVFSSLVFTTTVLNLLRIKVSDDLKDAIFFFLLLDLSKAA
RSLAVLYCYYQFRKMHKLGSKYILGIAGLFTVFSSLVFTTTVLNLLRIKVSDDLKDAIFFFLLLDLSKAA
RSLAVLYCYYQFRKMHKLGSKYILGIAGLFTVFSSLVFTTTVLNLLRIKVSDDLKDAIFFFLLLDLSKAA
RCLAVLYCYYHFKLHKLKSKYILSVAGLFTVFSSLVFTTTVLNLLRMVNTDLKDAIFFFLLLDLSKAA
RCLAVLYCYYQFRKMHKLGSKYILGIAGLFTVFSSLVFTTTVLNLLRIKVSDDLKDAIFFFLLLDLSKAA

```

# HMGR\_1DQ8

HMGR\_1DQ8  
 HMGR\_D\_rhizophagus  
 HMGR\_D\_ponderosae\_U5ZZ40  
 HMGR\_D\_jeffreyi\_Q9N6G8  
 HMGR\_D\_armandi\_A0A0F7LG51  
 HMGR\_I\_paraconfusus\_Q9XY99  
 HMGR\_I\_pini\_Q95WT1  
 HMGR\_L\_decemlineata\_A0A0H4ISG3  
 HMGR\_T\_castaneum\_A0A139WIA9

```

LLAQFALNGANQAERKNTNIAKGLAELGPTITLDTLTVETLVIGVGTMSGVARLEMLSWFA CLSVLVNYIVF
LLAQFALNGANQAERKNTNIAKGLAELGPTITLDTLTVETLVIGVGTMSGVARLEMLSWFA CLSVLVNYIVF
LLAQFALNGANQAERKNTNIAKGLAELGPTITLDTLTVETLVIGVGTMSGVARLEMLSWFA CLSVLVNYIVF
LLAQFALNGANQAERKNTNIAKGLAELGPTITLDTLTVETLVIGVGTMSGVARLEMLSWFA CLSVLVNYIVF
MLAQFALTSQNETEGKNNIAKGLAELGPTITLDTLTVETLVIGVGTMSGVARLEMLSWFA CLSVLVNYIVF
MLAQFALTSQNETEGKNNIAKGLAELGPTITLDTLTVETLVIGVGTMSGVARLEMLSWFA CLSVLVNYIVF
MLAQFALNASBTEVEKNNIAKGLAELGPTITLDTLTVETLVIGVGTMSGVARLEMLSWFA CLSVLVNYIVF
MLAQFALNASBTEVEKNNIAKGLAELGPTITLDTLTVETLVIGVGTMSGVARLEMLSWFA CLSVLVNYIVF
MLAQFALNASBTEVEKNNIAKGLAELGPTITLDTLTVETLVIGVGTMSGVARLEMLSWFA CLSVLVNYIVF
MLAQFALNASBTEVEKNNIAKGLAELGPTITLDTLTVETLVIGVGTMSGVARLEMLSWFA CLSVLVNYIVF

```

# HMGR\_1DQ8

HMGR\_1DQ8  
 HMGR\_D\_rhizophagus  
 HMGR\_D\_ponderosae\_U5ZZ40  
 HMGR\_D\_jeffreyi\_Q9N6G8  
 HMGR\_D\_armandi\_A0A0F7LG51  
 HMGR\_I\_paraconfusus\_Q9XY99  
 HMGR\_I\_pini\_Q95WT1  
 HMGR\_L\_decemlineata\_A0A0H4ISG3  
 HMGR\_T\_castaneum\_A0A139WIA9

```

MTFYFACLSLILSLSSNFCKTKDSWKILFAFKEDRKSNPVLQVRKILMSVGLMIVHVSRRWPFRRDSEV
MTFYFACLSLILSLSSNFCKTKDSWKILFAFKEDRKSNPVLQVRKILMSVGLMIVHVSRRWPFRRDSEV
MTFYFACLSLILSLSSNFCKTKDSWKILFAFKEDRKSNPVLQVRKILMSVGLMIVHVSRRWPFRRDSEV
MTFYFACLSLILSLSSNFCKTKDSWKILFAFKEDRKSNPVLQVRKILMSVGLMIVHVSRRWPFRRDSEV
MAFYFACLSLILSLSSNFCKTKDSWKILFAFKEDRKSNPVLQVRKILMSVGLMIVHVSRRWPFRRDSEV
MAFYFACLSLILSLSSNFCKTKDSWKILFAFKEDRKSNPVLQVRKILMSVGLMIVHVSRRWPFRRDSEV
MTFYFACLSLILSLSSNFCKTKDSWKILFAFKEDRKSNPVLQVRKILMSVGLMIVHVSRRWPFRRDSEV
MTFYFACLSLILSLSSNFCKTKDSWKILFAFKEDRKSNPVLQVRKILMSVGLMIVHVSRRWPFRRDSEV
MTFYFACLSLILSLSSNFCKTKDSWKILFAFKEDRKSNPVLQVRKILMSVGLMIVHVSRRWPFRRDSEV
MTFYFACLSLILSLSSNFCKTKDSWKILFAFKEDRKSNPVLQVRKILMSVGLMIVHVSRRWPFRRDSEV

```

# HMGR\_1DQ8

HMGR\_1DQ8  
 HMGR\_D\_rhizophagus  
 HMGR\_D\_ponderosae\_U5ZZ40  
 HMGR\_D\_jeffreyi\_Q9N6G8  
 HMGR\_D\_armandi\_A0A0F7LG51  
 HMGR\_I\_paraconfusus\_Q9XY99  
 HMGR\_I\_pini\_Q95WT1  
 HMGR\_L\_decemlineata\_A0A0H4ISG3  
 HMGR\_T\_castaneum\_A0A139WIA9

```

YTIEPLVQQS...FNKTTDDSIATHVSFIRWLVLGADHIVIIILVSALLKLIFFFEIKDNLVEIKS...
YTIEPLVQQS...FNKTTDDSIATHVSFIRWLVLGADHIVIIILVSALLKLIFFFEIKDNLVEIKS...
YTIEPLVQQS...FNKTTDDSIATHVSFIRWLVLGADHIVIIILVSALLKLIFFFEIKDNLVEIKS...
YTIEPLVQQS...FNKTTDDSIATHVSFIRWLVLGADHIVIIILVSALLKLIFFFEIKDNLVEIKS...
YNIIEPLVQQS...FNNTESSSVHLYFERWIALGADHIVILILITALLKLIFFFEIKDNLVEIKS...
YNIIEPLVQQS...FNNTESSSVHLYFERWIALGADHIVILILITALLKLIFFFEIKDNLVEIKS...
YNIIEPLVQQS...FNNTESSSVHLYFERWIALGADHIVILILITALLKLIFFFEIKDNLVEIKS...
YNIIEPLVQQS...FNNTESSSVHLYFERWIALGADHIVILILITALLKLIFFFEIKDNLVEIKS...
YNIIEPLVQQS...FNNTESSSVHLYFERWIALGADHIVILILITALLKLIFFFEIKDNLVEIKS...
YNIIEPLVQQS...FNNTESSSVHLYFERWIALGADHIVILILITALLKLIFFFEIKDNLVEIKS...

```

# HMGR\_1DQ8

HMGR\_1DQ8  
 HMGR\_D\_rhizophagus  
 HMGR\_D\_ponderosae\_U5ZZ40  
 HMGR\_D\_jeffreyi\_Q9N6G8  
 HMGR\_D\_armandi\_A0A0F7LG51  
 HMGR\_I\_paraconfusus\_Q9XY99  
 HMGR\_I\_pini\_Q95WT1  
 HMGR\_L\_decemlineata\_A0A0H4ISG3  
 HMGR\_T\_castaneum\_A0A139WIA9

```

...GFDKETS...KPKQKQMPMINFTLGES...CESTYKDKVQOT...LITS
...GFDKETP...KPKQKQMPMINFTLGES...CESTYKDKVQOT...LATS
...GFDKETP...KPKQKQMPMINFTLGES...CESTYKDKVQOT...LATS
...GFDRETP...KPKQKQMPMINFTLGES...CESTYKDKVQOT...LITS
EPEKSEKAE...NTEKEELKVVEVRANKRMPMSLSSEDD...CESTYKDKVQOT...QTPY
EPEKREKGE...NTEKEEPKVVEVRANKRMPMSLSSEDD...CESTYKDKVQOT...QTPY
ESLEKNSSSEFCINQNLNDKFPPEIPVYKPSKFFFLGKSDIDEKSDKSSVS...EVELEDKAIQTSRYDLN.E
ESVDPGKKD...NRFK...MPLIK...QSFFLTNNTEKEDS...ACEDDKVQOTDIGRLESE

```

# HMGR\_1DQ8

HMGR\_1DQ8  
 HMGR\_D\_rhizophagus  
 HMGR\_D\_ponderosae\_U5ZZ40  
 HMGR\_D\_jeffreyi\_Q9N6G8  
 HMGR\_D\_armandi\_A0A0F7LG51  
 HMGR\_I\_paraconfusus\_Q9XY99  
 HMGR\_I\_pini\_Q95WT1  
 HMGR\_L\_decemlineata\_A0A0H4ISG3  
 HMGR\_T\_castaneum\_A0A139WIA9

```

SVLVITQEPETELPREPRNNEECLOITGNAEKCAFLSDAEIIOIVNAKHFPAYKLETLIEIHERGVSI RR
NYDVDSSSDDVPKQCRSLKDCVKIFKNIDIGATALDDDEIILTKNKNIAAYQIEKEVDDPERGVGIRR
NSDVDSSSDDVPKQCRSLKDCVKIFKNIDIGATALDDDEIILTKNKNIAAYQIEKEVDDPERGVGIRR
NSDVDSSSDDVPKQCRSLKDCVKIFKNIDIGATALDDDEIILTKNKNIAAYQIEKEVDDPERGVGIRR
NSDVDSSSDDVPKQCRSLKDCVKIFKNIDIGATALDDDEIILTKNKNIAAYQIEKEVDDPERGVGIRR
NSEAHSSSEDDIPKVKCTLEDCLKIYNNVDMGATALDDDEIILTKNKNIAAYQIEKEVDDPERGVGIRR
NPDAHSSSEDDIPKVKCTLEDCLKIYNNVDMGATALDDDEIILTKNKNIAAYQIEKEVDDPERGVGIRR
QNLLSENNEENVKNSCRTLEECLATYNDFDGAVALNDEEVIILVKKKHIAAYQIEKEVDDPERGVGIRR
EKLPAAGNDVSVK.TCRSLEECLKIYNDSDNIGGALSDDEVIILVKNKHIAAYQIEKEVDDPERGVGIRR

```

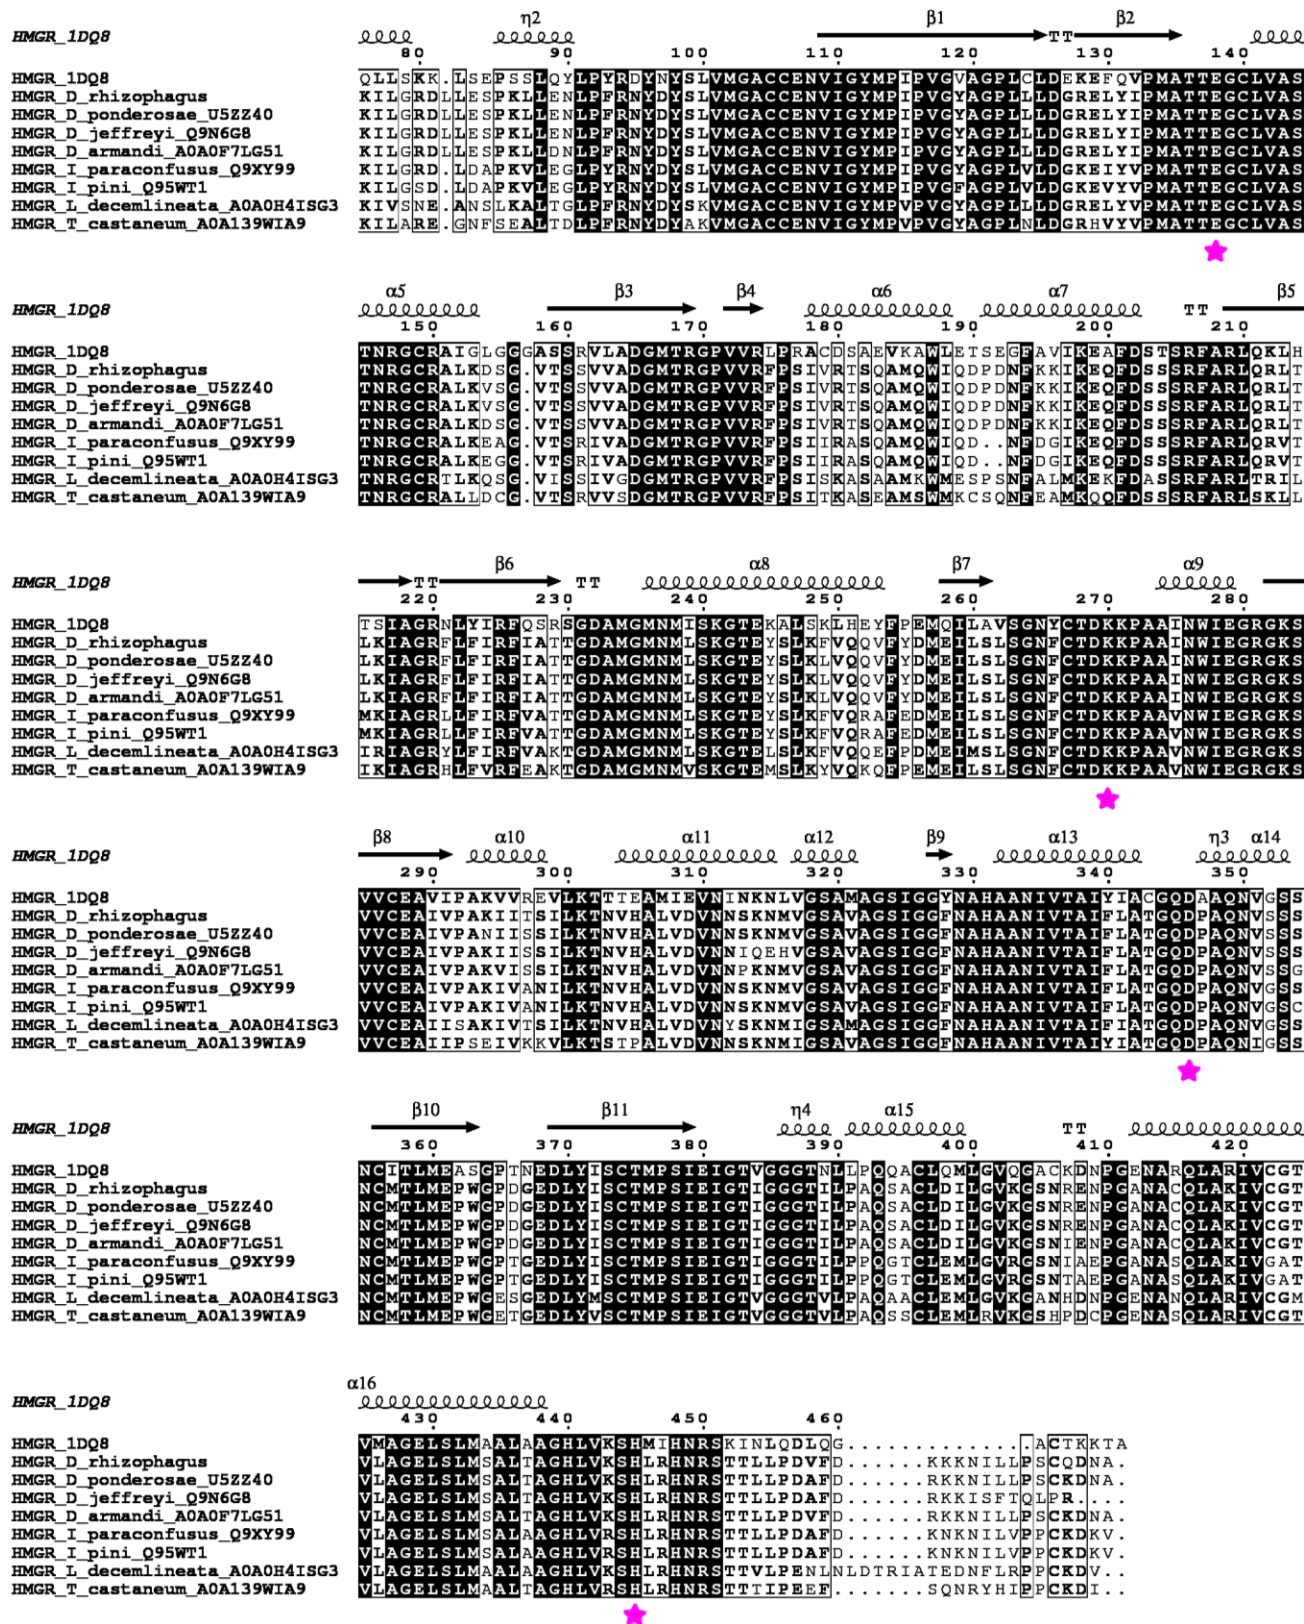

**Figure S3.** Multiple sequence alignment and assignment of secondary structure elements to 3-hydroxy-3-methylglutaryl-CoA reductase (HMGR) by ESPrnt 3.0, according to the *Homo sapiens* protein structure (PDB: 1DQ8). The multiple alignments included genus *Dendroctonus* and other coleopteran sequences. TMHMM Server v. 2.0 predicted five transmembrane helices (blue boxes). Conserved amino acids involved in the catalytic activity (★) were manually tagged according to previous studies [110] and ExPASy-PROSITE server (<http://prosite.expasy.org/>).



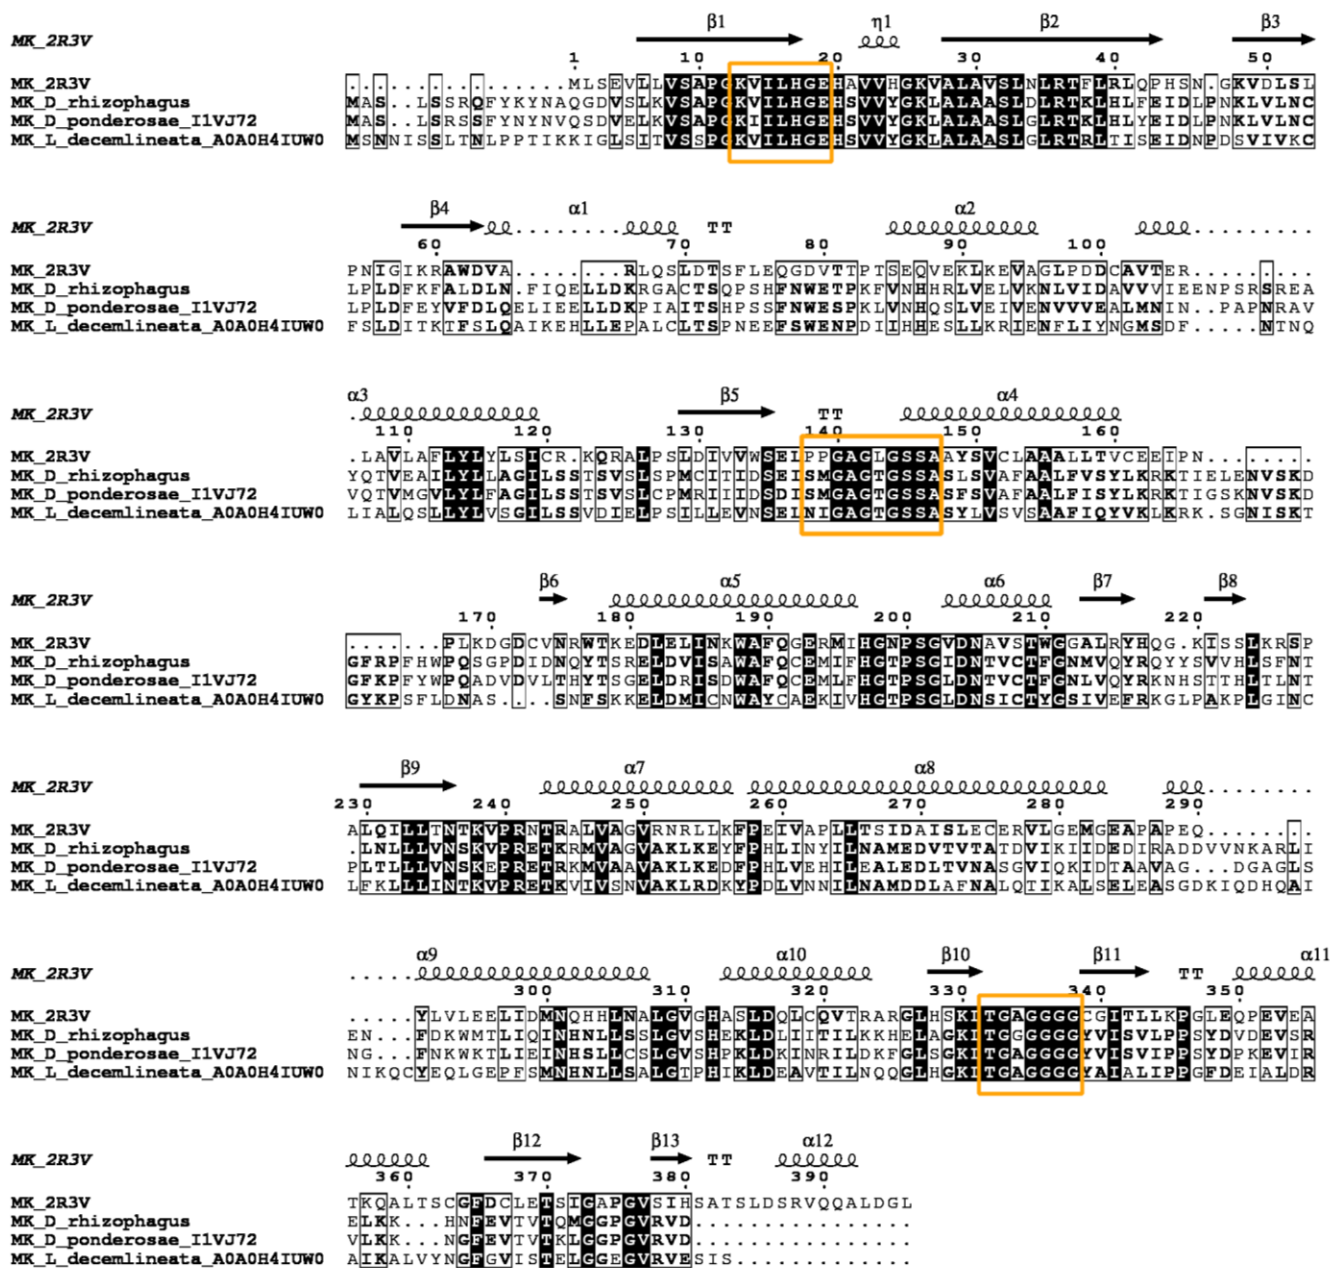

**Figure S4.** Multiple sequence alignment and assignment of secondary structure elements to mevalonate kinase (MK) by ESPrict 3.0, according to the *Homo sapiens* protein structure (PDB: 2R3V). The multiple alignments included genus *Dendroctonus* and other coleopteran sequences. Conserved motifs (orange boxes) were manually tagged according to previous studies [111–113].

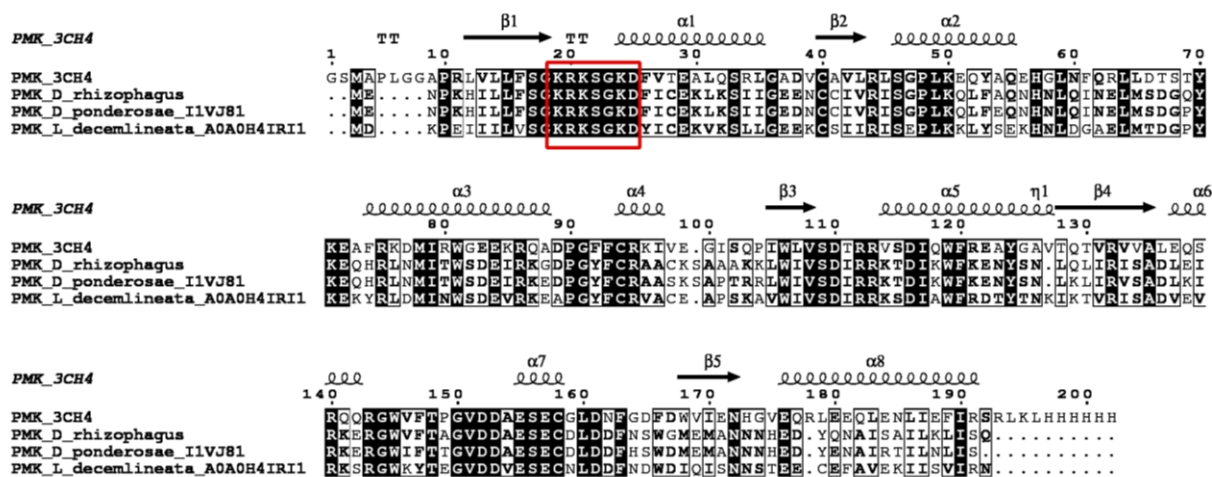

**Figure S5.** Multiple sequence alignment and assignment of secondary structure elements to phosphomevalonate kinase (PMK) by ESPript 3.0, according to the *Homo sapiens* protein structure (PDB: 3CH4). The multiple alignments included genus *Dendroctonus* and other coleopteran sequences. Conserved motif (red box) was manually tagged according to previous studies [114,115].



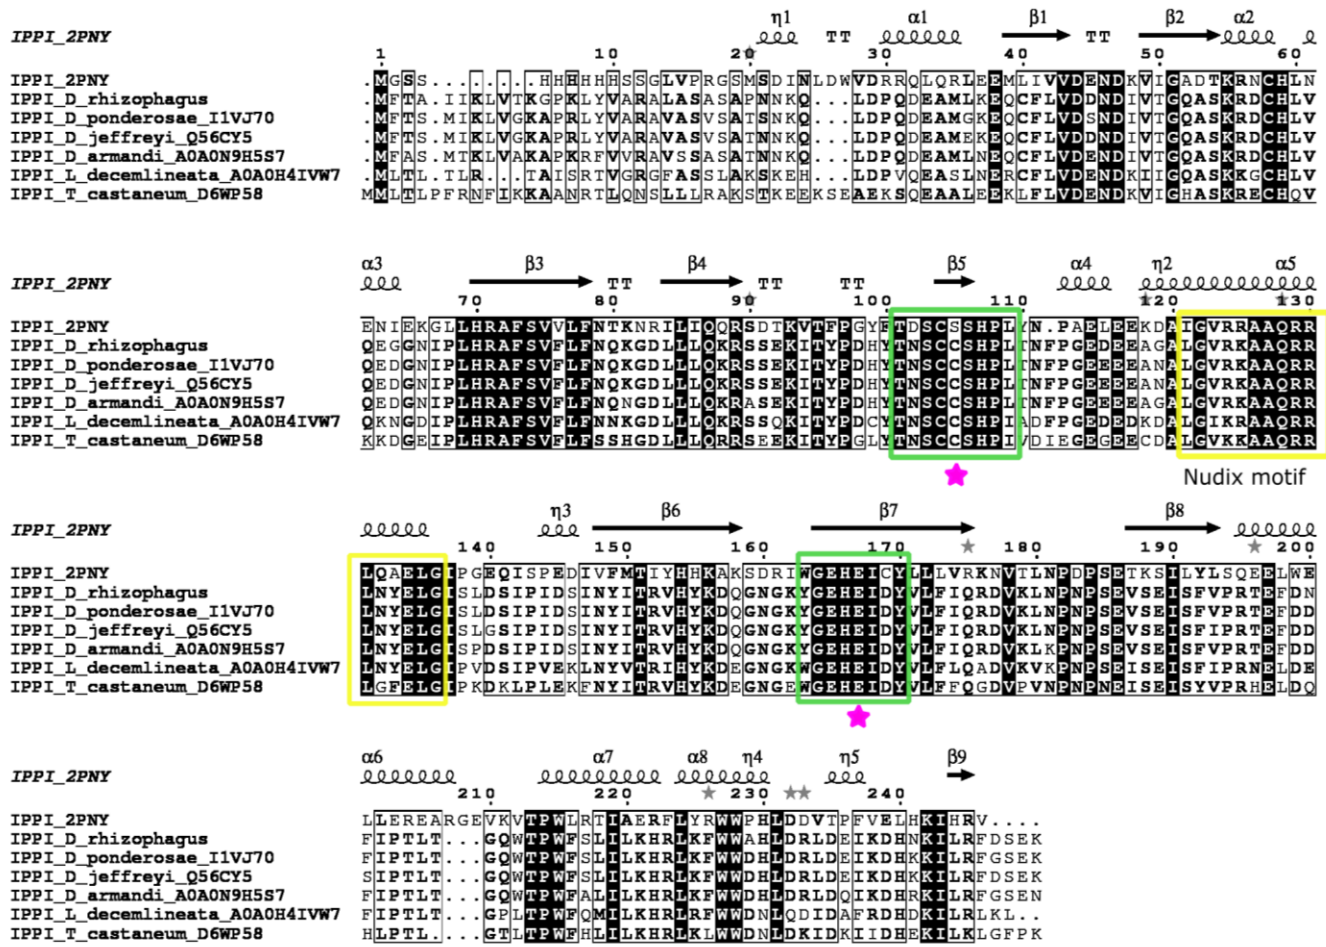

**Figure S7.** Multiple sequence alignment and assignment of secondary structure elements to isopentenyl diphosphate isomerase (IPPI) by ESPrnt 3.0, according to the *Homo sapiens* protein structure (PDB: 2PNY). The multiple alignments included genus *Dendroctonus* and other coleopteran sequences. Conserved motifs (green and yellow boxes) and amino acids involved in the catalytic activity (★) were manually tagged according to previous studies [118,119] and ExPASy-PROSITE server (<http://prosite.expasy.org/>).



MFS.MKMCNNRNSCREFFLEARRTTISKTS.TDKNSDAISRQDEKLN.VESDSNGSYSRWKQMHNN  
MFS.MKLCNNRNSCREFFLEARRTTISKTS.TDKNSDAISRQDEKLN.VESDSTGSYSRWKQMHNN  
MFS.MKLCNNRNSCREFFLEARRTTISKTS.TDKNSDAISRQDEKLN.VESDSTGSYSRWKQMHNN  
MFS.MKVCNNRNSCREFFLEARRTTISKTS.TDKNSDAISRQDEKLN.VESDSTGSYSRWKQMHNN  
MFS.MKACNNRNSCTRWLEFFRRNISKTS.TDKNSDAISRQDKMQHASKTHEVAFENKLSYTRWQKMQHN  
MFS.SKKLAINRNTSREILREIRRHISKTT.GVTNSDAISRQESKLGG.NLDLNGSDYGESRNKWKISKQO

RxxS
 α1
α2
α3

1 10 20 30 40 50

N I R A L S T I Q Q S M I R P V Q S S A L V T K D Q S R D F M A L F P D L V R E L T E V G R S Q E L P D V M R R F A R V L Q Y N T P T G K  
 N I R A L S T I Q Q S M I R P V Q S S A L V T K E Q S R D F M A L F P D L V R E L T E V G K S Q E L P D V M R R F A R V L Q Y N T P T G K  
 N I R A L S T I Q Q S M I R P V Q S S A L V T K E Q S R D F M A L F P D L V R E L T E V G K S Q E L H D V M R R F A R V L Q Y N T P T G K  
 N I R A L S T I Q Q S M V R P V Q S S A L V T K E Q S R D F M A L F P D L V R E L T E V G R S Q E L P D V M R R F A R V L Q Y N T P T G K  
 N I R A L S T I Q Q T L V R P Q S S L A S K E Q S R D F M A L F P D I I R E L T E V G R N Q E L P E V M K R Y A R V L Q Y N T P N G K  
 N I R A L S T I Q Q T K V K P P V S S T P V F S K E S R E F M A L F P D I V R D L T D A G R H D I P E V T K R F A K V L Q Y N V P T G K

[illegible]

$\alpha 6$   $\alpha 7$   $\alpha 8$   
00000000000000000000 00000000000000000000 TTT 00000000  
130 140 150 160 170 180 190  
AINDSFLLESVYRVLKKYCQRQPYVHHLELFLQTAYQTETGOMLDLITAP.VSKVDLSHFSEERKAI  
AINDALMVENAVYLLKKRHLKDHMPVPLMELEFHDGNLKTTLGQSLDLMCLDNTNGKPKLDMFTMSRYTSI  
AVNDAMVIMENAVYLLKKRHLKDHMPVPLMELEFHEGNLKTTLGQSLDLMCLDNTNGKPKLDMFTMSRYTSI  
AVNDAMVIMENAVYLLKKRHLKDHMPVPLMELEFHEGNLKTTLGQSLDLMCLDNTNGKPKLDMFTMSRYTSI  
AINDAIMMENAVYLLKKRHLKDHMPVPMMELEFHEGTIKTTLGQSLDLMCLDNTNGKPKLDMFTMSRYTSI  
AVYDAMVMENGVYLLKKRHLKDHMPVMTNIELEFHEDMALKTSLGQSLDLMCLDNDGKPKLDIHNE.QDTSI  
AFNDAILLEHGYILLKKRHFQHHCVYPTIMELEFHDVTLKTSMGQALDCLCNK.DGKPNLELFTMNKYSI  
AVIDGTLLESSTIYILRKRYFDHPSVPIELEFHDVTLKCSMGKSLDGYIMN.NAGSDLSRFTMKNYNL

$\alpha 9$                        $\alpha 10$                                        $\alpha 11$   
00000 0000 0000000000                      000000000000000000000000  
 200                      210                                      220                      230                      240                      250                      260  
 VKYKTAFFYSFYIPVAAAMMYMVGIDSKREEHENAKAILLEMGEYFOIODDVLDFCFGDPATTKGVGTDITQDNK  
 VKYKTAFFYSQMPVAIAMYLAGMSDEEEOHROAKTILMEMGFFFOIODDVLDFCFGDPVTGKVGTDITQDGK  
 VKYKTAFFYSQMPVAIAMYLAGMSDEEEOHROAKTILMEMGFFFOIODDVLDFCFGDPVTGKVGTDITQDGK  
 VKYKTAFFYSQMPVAIAMYLAGMSDEEEOHROAKTILMEMGFFFOIODDVLDFCFGDPVTGKVGTDITQDGK  
 VNYKTSYYSPFYIPVAAAMMYLLGMDPEEOHROAKTILLDMGFFFOIODDVLDFCFGDPNVTGKLGTDITQDGK  
 VKYKTAFFYSQMPVAIAMMYANLYDPEEMHROAKTILMEMGLFFFOIODDVLDFCFGDPVEVTGKKGNDIREGK  
 MKYRTGYHSEQLFVGAAMYLAQMYPDEEOHROAKTILLLELGOFYOIKQDELNCFGDSQVTKWKLGSHTINEG

$\alpha 12$                        $\alpha 13$                        $\alpha 14$                        $\alpha 15$   
00000000                      0000000000                      00000000000000                      0000000000000000  
270                      280                      290                      300                      310                      320                      330  
CSWLIVVQGLORVTFEQRQLLEDN YCRKKEPEKVAKVKEYL EAVGMRRAAFQQYEEESYRRLQEL IEKHSNRI  
CSWLAVVALQORASPAQRKIMEEH YGRSEPESSVARIKNLYVDLC LPNTYAYIYEEESFNIIKTH IQQISKGL  
CSWLAVVALQORASPAQRKIMEEH YGRPEPESIARIKNLYVDLC LPNTYAYIYEEESFNIIKTH IQQISKGL  
CSWLAVVALQORASPAQRKIMEEH YGRPEPESIARIKNLYVDLC LPNTYAYIYEEESFNIIKTH IQQISKGL  
CSWLAVVALQORASAAQRKIMEEH YGRPEPESSVAIKNLYVDLC LPNTYAYIYEEESFNIIKTH IQQISKGL  
CSWLAVMALQORSTPAQRKIMEEH YGRPEPESSVAIIKQLYEDLT LPNTYAYIYEEESFNIIKTH IQQISKDC  
CSWLAVVALQORANPTQRKIMEEH YGRPDPEAVRIIRNLYBELS LPNTYAYIYEEESFNIIKTH IQQISKGL  
CSWLAVVALQORANPSQRKIMEEKY YGQGGEESEVIVKNLYBELGLP ATAYACYEESYKLIHTH IQQISKGL

**α16**

oooooooo

340

PKEIFLGLAQKIYKRQ  
RHDLFKIMEKIYKREC  
RHDLFKIMEKIYKREC  
RHDLFKIMENIYKREC  
RHDLFKIMEKIYKREC  
VTIFSKHYGEAFKRES  
PHKLFKIMEKIYRRD  
PHKLFLLDLKLFENQ
