# Supplementary material for: The Differential Expression of Mevalonate Pathway Genes in the Gut of the Bark Beetle Dendroctonus rhizophagus (Curculionidae: Scolytinae) Is Unrelated to the de Novo Synthesis of Terpenoid Pheromones
Source: MDPI journal article supplement (doi:10.3390/ijms20164011), 2019-08-17
Supplement: s1 [file s1]

**Table S1.** Three-way ANOVA results from the comparison of relative expression levels of feeding treatment in *D. rhizophagus*.

|               | <i>df</i> | <i>AACT</i> |                  | <i>HMGS</i> |                  | <i>HMGR</i> |                  | <i>MK</i> |                  | <i>PMK</i> |                  | <i>MDPC</i> |                  | <i>IPPI</i> |                  | <i>GPPS/FPPS</i> |                  | <i>GGPPS</i> |              |
|---------------|-----------|-------------|------------------|-------------|------------------|-------------|------------------|-----------|------------------|------------|------------------|-------------|------------------|-------------|------------------|------------------|------------------|--------------|--------------|
|               |           | <i>F</i>    | <i>P</i>         | <i>F</i>    | <i>P</i>         | <i>F</i>    | <i>P</i>         | <i>F</i>  | <i>P</i>         | <i>F</i>   | <i>P</i>         | <i>F</i>    | <i>P</i>         | <i>F</i>    | <i>P</i>         | <i>F</i>         | <i>P</i>         | <i>F</i>     | <i>P</i>     |
| Sex (S)       | 1         | 18.71       | <b>&lt;0.001</b> | 71.52       | <b>&lt;0.001</b> | 26.08       | <b>&lt;0.001</b> | 31.07     | <b>&lt;0.001</b> | 175.83     | <b>&lt;0.001</b> | 27.39       | <b>&lt;0.001</b> | 42.40       | <b>&lt;0.001</b> | 7.71             | <b>0.008</b>     | 0.20         | 0.65         |
| Condition (C) | 1         | 0.59        | 0.45             | 2.18        | 0.15             | 1.90        | 0.17             | 26.56     | <b>&lt;0.001</b> | 2.31       | 0.14             | 23.82       | <b>&lt;0.001</b> | 12.49       | <b>0.001</b>     | 32.33            | <b>&lt;0.001</b> | 9.96         | <b>0.003</b> |
| Time (t)      | 1         | 18.64       | <b>&lt;0.001</b> | 1.07        | 0.31             | 0.042       | 0.84             | 8.96      | <b>0.005</b>     | 18.73      | <b>&lt;0.001</b> | 1.74        | 0.19             | 1.87        | 0.18             | 5.74             | <b>0.021</b>     | 2.08         | 0.16         |
| S*C           | 1         | 0.93        | 0.34             | 0.95        | 0.33             | 3.29        | 0.077            | 0.72      | 0.400            | 12.04      | <b>0.001</b>     | 4.86        | <b>0.033</b>     | 7.47        | <b>0.009</b>     | 1.11             | 0.29             | 1.53         | 0.22         |
| S*t           | 1         | 0.003       | 0.96             | 2.82        | 0.10             | 0.32        | 0.57             | 3.15      | 0.084            | 13.78      | <b>&lt;0.001</b> | 9.18        | <b>0.004</b>     | 3.95        | 0.054            | 4.77             | <b>0.035</b>     | 5.31         | <b>0.026</b> |
| C*t           | 1         | 0.93        | 0.34             | 0.69        | 0.41             | 0.76        | 0.39             | 3.24      | 0.079            | 11.51      | <b>0.002</b>     | 11.62       | <b>0.002</b>     | 0.19        | 0.66             | 2.40             | 0.13             | 5.10         | <b>0.029</b> |
| S*C*t         | 1         | 0.006       | 0.94             | 1.77        | 0.19             | 0.13        | 0.72             | 0.85      | 0.36             | 17.72      | <b>&lt;0.001</b> | 23.11       | <b>&lt;0.001</b> | 2.20        | 0.14             | 7.98             | <b>0.007</b>     | 1.22         | 0.28         |

Bold fonts indicate significant difference.

**Table S2.** Two-way ANOVA results from the comparison of relative expression levels of JH III treatment in *D. rhizophagus*.

|          | <i>df</i> | <i>AACT</i> |              | <i>HMGS</i> |              | <i>HMGR</i> |                  | <i>MK</i> |                  | <i>PMK</i> |                  | <i>MDPC</i> |              | <i>IPPI</i> |              | <i>GPPS/FPPS</i> |              | <i>GGPPS</i> |              |
|----------|-----------|-------------|--------------|-------------|--------------|-------------|------------------|-----------|------------------|------------|------------------|-------------|--------------|-------------|--------------|------------------|--------------|--------------|--------------|
|          |           | <i>F</i>    | <i>P</i>     | <i>F</i>    | <i>P</i>     | <i>F</i>    | <i>P</i>         | <i>F</i>  | <i>P</i>         | <i>F</i>   | <i>P</i>         | <i>F</i>    | <i>P</i>     | <i>F</i>    | <i>P</i>     | <i>F</i>         | <i>P</i>     | <i>F</i>     | <i>P</i>     |
| Sex (S)  | 1         | 0.76        | 0.39         | 1.09        | 0.31         | 17.73       | <b>&lt;0.001</b> | 67.89     | <b>&lt;0.001</b> | 2.15       | 0.16             | 5.56        | <b>0.029</b> | 0.30        | 0.59         | 4.69             | <b>0.043</b> | 0.81         | 0.38         |
| Time (t) | 1         | 0.23        | 0.64         | 8.36        | <b>0.009</b> | 17.77       | <b>&lt;0.001</b> | 5.17      | <b>0.034</b>     | 88.42      | <b>&lt;0.001</b> | 3.33        | 0.083        | 0.34        | 0.57         | 0.66             | 0.42         | 7.09         | <b>0.015</b> |
| S*t      | 1         | 9.29        | <b>0.006</b> | 11.21       | <b>0.003</b> | 22.51       | <b>&lt;0.001</b> | 98.87     | <b>&lt;0.001</b> | 0.049      | 0.83             | 2.95        | 0.10         | 4.62        | <b>0.044</b> | 9.58             | <b>0.006</b> | 4.13         | 0.056        |

Bold fonts indicate significant difference.

**Table S3.** Tukey's test comparisons for JH III treatment in *D. rhizophagus*.

**AACT**

| Comparisons for factor | Comparison        | Diff of Means | p | q     | P     | P<0.050    |
|------------------------|-------------------|---------------|---|-------|-------|------------|
| Sex                    | Males vs. Females | 0.285         | 2 | 1.229 | 0.395 | No         |
| Time                   | 8.000 vs. 24.000  | 0.157         | 2 | 0.676 | 0.638 | No         |
| Time within Males      | 8.000 vs. 24.000  | 1.157         | 2 | 3.527 | 0.022 | <b>Yes</b> |
| Time within Females    | 8.000 vs. 24.000  | 0.844         | 2 | 2.571 | 0.084 | No         |
| Sex within 8           | Males vs. Females | 0.715         | 2 | 2.18  | 0.139 | No         |
| Sex within 24          | Males vs. Females | 1.285         | 2 | 3.918 | 0.012 | <b>Yes</b> |

**HMGS**

| Comparisons for factor | Comparison        | Diff of Means | p | q     | P      | P<0.050    |
|------------------------|-------------------|---------------|---|-------|--------|------------|
| Sex                    | Males vs. Females | 0.533         | 2 | 1.477 | 0.309  | No         |
| Time                   | 8.000 vs. 24.000  | 1.476         | 2 | 4.089 | 0.009  | <b>Yes</b> |
| Time within Males      | 8.000 vs. 24.000  | 3.185         | 2 | 6.239 | <0.001 | <b>Yes</b> |
| Time within Females    | 8.000 vs. 24.000  | 0.233         | 2 | 0.457 | 0.75   | No         |
| Sex within 8           | Males vs. Females | 1.176         | 2 | 2.303 | 0.119  | No         |
| Sex within 24          | Males vs. Females | 2.243         | 2 | 4.392 | 0.006  | <b>Yes</b> |

**HMGR**

| Comparisons for factor | Comparison        | Diff of Means | p | q     | P      | P<0.050    |
|------------------------|-------------------|---------------|---|-------|--------|------------|
| Sex                    | Males vs. Females | 0.461         | 2 | 5.956 | <0.001 | <b>Yes</b> |
| Time                   | 8.000 vs. 24.000  | 0.461         | 2 | 5.962 | <0.001 | <b>Yes</b> |
| Time within Males      | 8.000 vs. 24.000  | 0.98          | 2 | 8.96  | <0.001 | <b>Yes</b> |
| Time within Females    | 8.000 vs. 24.000  | 0.0579        | 2 | 0.529 | 0.712  | No         |
| Sex within 8           | Males vs. Females | 0.98          | 2 | 8.956 | <0.001 | <b>Yes</b> |
| Sex within 24          | Males vs. Females | 0.0584        | 2 | 0.533 | 0.71   | No         |

**MK**

| Comparisons for factor | Comparison        | Diff of Means | p | q      | P      | P<0.050    |
|------------------------|-------------------|---------------|---|--------|--------|------------|
| Sex                    | Males vs. Females | 0.471         | 2 | 11.653 | <0.001 | <b>Yes</b> |
| Time                   | 8.000 vs. 24.000  | 0.13          | 2 | 3.216  | 0.034  | <b>Yes</b> |
| Time within Males      | 8.000 vs. 24.000  | 0.439         | 2 | 7.669  | <0.001 | <b>Yes</b> |
| Time within Females    | 8.000 vs. 24.000  | 0.699         | 2 | 12.218 | <0.001 | <b>Yes</b> |
| Sex within 8           | Males vs. Females | 0.0975        | 2 | 1.704  | 0.243  | No         |
| Sex within 24          | Males vs. Females | 1.04          | 2 | 18.183 | <0.001 | <b>Yes</b> |

**PMK**

| Comparisons for factor | Comparison        | Diff of Means | p | q      | P      | P<0.050    |
|------------------------|-------------------|---------------|---|--------|--------|------------|
| Sex                    | Males vs. Females | 0.0878        | 2 | 2.072  | 0.159  | No         |
| Time                   | 8.000 vs. 24.000  | 0.564         | 2 | 13.298 | <0.001 | <b>Yes</b> |
| Time within Males      | 8.000 vs. 24.000  | 0.55          | 2 | 9.181  | <0.001 | <b>Yes</b> |
| Time within Females    | 8.000 vs. 24.000  | 0.577         | 2 | 9.626  | <0.001 | <b>Yes</b> |
| Sex within 8           | Males vs. Females | 0.101         | 2 | 1.688  | 0.247  | No         |
| Sex within 24          | Males vs. Females | 0.0745        | 2 | 1.243  | 0.39   | No         |

**MDPC**

| Comparisons for factor | Comparison        | Diff of Means | p | q     | P     | P<0.050    |
|------------------------|-------------------|---------------|---|-------|-------|------------|
| Sex                    | Males vs. Females | 2.57          | 2 | 3.336 | 0.029 | <b>Yes</b> |
| Time                   | 8.000 vs. 24.000  | 1.99          | 2 | 2.582 | 0.083 | No         |
| Time within Males      | 8.000 vs. 24.000  | 0.118         | 2 | 0.108 | 0.94  | No         |
| Time within Females    | 8.000 vs. 24.000  | 3.862         | 2 | 3.544 | 0.021 | <b>Yes</b> |
| Sex within 8           | Males vs. Females | 0.698         | 2 | 0.641 | 0.655 | No         |
| Sex within 24          | Males vs. Females | 4.442         | 2 | 4.076 | 0.009 | <b>Yes</b> |

**IPPI**

| Comparisons for factor | Comparison        | Diff of Means | p | q     | P     | P<0.050 |
|------------------------|-------------------|---------------|---|-------|-------|---------|
| Sex                    | Males vs. Females | 0.359         | 2 | 0.775 | 0.59  | No      |
| Time                   | 8.000 vs. 24.000  | 0.38          | 2 | 0.819 | 0.569 | No      |
| Time within Males      | 8.000 vs. 24.000  | 1.029         | 2 | 1.571 | 0.28  | No      |
| Time within Females    | 8.000 vs. 24.000  | 1.788         | 2 | 2.73  | 0.068 | No      |
| Sex within 8           | Males vs. Females | 1.05          | 2 | 1.602 | 0.271 | No      |
| Sex within 24          | Males vs. Females | 1.768         | 2 | 2.698 | 0.071 | No      |

**GPSS/EPSS**

| Comparisons for factor | Comparison        | Diff of Means | p | q     | P     | P<0.050    |
|------------------------|-------------------|---------------|---|-------|-------|------------|
| Sex                    | Males vs. Females | 0.116         | 2 | 3.064 | 0.043 | <b>Yes</b> |
| Time                   | 8.000 vs. 24.000  | 0.0437        | 2 | 1.151 | 0.425 | No         |
| Time within Males      | 8.000 vs. 24.000  | 0.122         | 2 | 2.28  | 0.123 | No         |
| Time within Females    | 8.000 vs. 24.000  | 0.21          | 2 | 3.909 | 0.012 | <b>Yes</b> |
| Sex within 8           | Males vs. Females | 0.0498        | 2 | 0.928 | 0.519 | No         |
| Sex within 24          | Males vs. Females | 0.282         | 2 | 5.261 | 0.002 | <b>Yes</b> |

**GGPPS**

| Comparisons for factor | Comparison        | Diff of Means | p | q     | P     | P<0.050    |
|------------------------|-------------------|---------------|---|-------|-------|------------|
| Sex                    | Males vs. Females | 0.528         | 2 | 1.276 | 0.378 | No         |
| Time                   | 8.000 vs. 24.000  | 1.558         | 2 | 3.765 | 0.015 | <b>Yes</b> |
| Time within Males      | 8.000 vs. 24.000  | 2.746         | 2 | 4.695 | 0.004 | <b>Yes</b> |
| Time within Females    | 8.000 vs. 24.000  | 0.369         | 2 | 0.63  | 0.661 | No         |
| Sex within 8           | Males vs. Females | 1.716         | 2 | 2.934 | 0.051 | No         |
| Sex within 24          | Males vs. Females | 0.661         | 2 | 1.13  | 0.434 | No         |

**Table S4.** Tukey's test comparisons for feeding treatment in *D. rhizophagus*.**AACT**

| Comparisons for factor   | Comparison          | Diff of Means | p | q     | P      | P<0.050    |
|--------------------------|---------------------|---------------|---|-------|--------|------------|
| Sex                      | Males vs. Females   | 1.826         | 2 | 6.118 | <0.001 | <b>Yes</b> |
| Condition                | Paired vs. Solitary | 0.325         | 2 | 1.087 | 0.447  | No         |
| Time                     | 8.000 vs. 24.000    | 1.822         | 2 | 6.105 | <0.001 | <b>Yes</b> |
| Condition within Males   | Paired vs. Solitary | 0.732         | 2 | 1.733 | 0.228  | No         |
| Condition within Females | Paired vs. Solitary | 0.0826        | 2 | 0.196 | 0.891  | No         |
| Sex within Solitary      | Males vs. Females   | 1.419         | 2 | 3.362 | 0.022  | <b>Yes</b> |
| Sex within Paired        | Males vs. Females   | 2.233         | 2 | 5.29  | <0.001 | <b>Yes</b> |
| Time within Males        | 8.000 vs. 24.000    | 1.799         | 2 | 4.262 | 0.005  | <b>Yes</b> |
| Time within Females      | 8.000 vs. 24.000    | 1.846         | 2 | 4.372 | 0.004  | <b>Yes</b> |
| Sex within 8             | Males vs. Females   | 1.849         | 2 | 4.381 | 0.004  | <b>Yes</b> |
| Sex within 24            | Males vs. Females   | 1.803         | 2 | 4.271 | 0.005  | <b>Yes</b> |
| Time within Solitary     | 8.000 vs. 24.000    | 1.414         | 2 | 3.35  | 0.023  | <b>Yes</b> |
| Time within Paired       | 8.000 vs. 24.000    | 2.23          | 2 | 5.284 | <0.001 | <b>Yes</b> |
| Condition within 8       | Paired vs. Solitary | 0.0836        | 2 | 0.198 | 0.889  | No         |
| Condition within 24      | Paired vs. Solitary | 0.733         | 2 | 1.736 | 0.227  | No         |

**HMGS**

| Comparisons for factor   | Comparison          | Diff of Means | p | q      | P      | P<0.050    |
|--------------------------|---------------------|---------------|---|--------|--------|------------|
| Sex                      | Males vs. Females   | 5.604         | 2 | 11.96  | <0.001 | <b>Yes</b> |
| Condition                | Paired vs. Solitary | 0.978         | 2 | 2.088  | 0.148  | No         |
| Time                     | 8.000 vs. 24.000    | 0.686         | 2 | 1.464  | 0.307  | No         |
| Condition within Males   | Paired vs. Solitary | 1.626         | 2 | 2.453  | 0.091  | No         |
| Condition within Females | Paired vs. Solitary | 0.331         | 2 | 0.5    | 0.726  | No         |
| Sex within Solitary      | Males vs. Females   | 4.957         | 2 | 7.48   | <0.001 | <b>Yes</b> |
| Sex within Paired        | Males vs. Females   | 6.251         | 2 | 9.434  | <0.001 | <b>Yes</b> |
| Time within Males        | 8.000 vs. 24.000    | 1.799         | 2 | 2.715  | 0.062  | No         |
| Time within Females      | 8.000 vs. 24.000    | 0.428         | 2 | 0.645  | 0.651  | No         |
| Sex within 8             | Males vs. Females   | 6.718         | 2 | 10.137 | <0.001 | <b>Yes</b> |
| Sex within 24            | Males vs. Females   | 4.491         | 2 | 6.777  | <0.001 | <b>Yes</b> |
| Time within Solitary     | 8.000 vs. 24.000    | 0.132         | 2 | 0.199  | 0.889  | No         |
| Time within Paired       | 8.000 vs. 24.000    | 1.24          | 2 | 1.871  | 0.193  | No         |
| Condition within 8       | Paired vs. Solitary | 1.532         | 2 | 2.312  | 0.11   | No         |
| Condition within 24      | Paired vs. Solitary | 0.424         | 2 | 0.64   | 0.653  | No         |

**HMGR**

| Comparisons for factor   | Comparison          | Diff of Means | p | q     | P      | P<0.050    |
|--------------------------|---------------------|---------------|---|-------|--------|------------|
| Sex                      | Males vs. Females   | 4.029         | 2 | 7.223 | <0.001 | <b>Yes</b> |
| Condition                | Paired vs. Solitary | 1.089         | 2 | 1.952 | 0.175  | No         |
| Time                     | 8.000 vs. 24.000    | 0.162         | 2 | 0.291 | 0.838  | No         |
| Condition within Males   | Paired vs. Solitary | 2.519         | 2 | 3.194 | 0.03   | <b>Yes</b> |
| Condition within Females | Paired vs. Solitary | 0.342         | 2 | 0.433 | 0.761  | No         |
| Sex within Solitary      | Males vs. Females   | 2.598         | 2 | 3.294 | 0.025  | <b>Yes</b> |
| Sex within Paired        | Males vs. Females   | 5.459         | 2 | 6.921 | <0.001 | <b>Yes</b> |
| Time within Males        | 8.000 vs. 24.000    | 0.608         | 2 | 0.771 | 0.589  | No         |
| Time within Females      | 8.000 vs. 24.000    | 0.284         | 2 | 0.36  | 0.801  | No         |
| Sex within 8             | Males vs. Females   | 4.475         | 2 | 5.673 | <0.001 | <b>Yes</b> |
| Sex within 24            | Males vs. Females   | 3.583         | 2 | 4.542 | 0.003  | <b>Yes</b> |
| Time within Solitary     | 8.000 vs. 24.000    | 0.849         | 2 | 1.076 | 0.451  | No         |
| Time within Paired       | 8.000 vs. 24.000    | 0.525         | 2 | 0.665 | 0.641  | No         |
| Condition within 8       | Paired vs. Solitary | 0.402         | 2 | 0.51  | 0.721  | No         |
| Condition within 24      | Paired vs. Solitary | 1.776         | 2 | 2.251 | 0.119  | No         |

**MK**

| Comparisons for factor   | Comparison          | Diff of Means | p | q     | P      | P<0.050    |
|--------------------------|---------------------|---------------|---|-------|--------|------------|
| Sex                      | Males vs. Females   | 0.8           | 2 | 7.883 | <0.001 | <b>Yes</b> |
| Condition                | Paired vs. Solitary | 0.739         | 2 | 7.288 | <0.001 | <b>Yes</b> |
| Time                     | 8.000 vs. 24.000    | 0.429         | 2 | 4.233 | 0.005  | <b>Yes</b> |
| Condition within Males   | Paired vs. Solitary | 0.861         | 2 | 6.004 | <0.001 | <b>Yes</b> |
| Condition within Females | Paired vs. Solitary | 0.617         | 2 | 4.303 | 0.004  | <b>Yes</b> |
| Sex within Solitary      | Males vs. Females   | 0.678         | 2 | 4.724 | 0.002  | <b>Yes</b> |
| Sex within Paired        | Males vs. Females   | 0.922         | 2 | 6.425 | <0.001 | <b>Yes</b> |
| Time within Males        | 8.000 vs. 24.000    | 0.684         | 2 | 4.767 | 0.002  | <b>Yes</b> |
| Time within Females      | 8.000 vs. 24.000    | 0.175         | 2 | 1.219 | 0.394  | No         |
| Sex within 8             | Males vs. Females   | 1.054         | 2 | 7.349 | <0.001 | <b>Yes</b> |
| Sex within 24            | Males vs. Females   | 0.545         | 2 | 3.8   | 0.011  | <b>Yes</b> |
| Time within Solitary     | 8.000 vs. 24.000    | 0.171         | 2 | 1.193 | 0.404  | No         |
| Time within Paired       | 8.000 vs. 24.000    | 0.688         | 2 | 4.794 | 0.002  | <b>Yes</b> |
| Condition within 8       | Paired vs. Solitary | 0.998         | 2 | 6.954 | <0.001 | <b>Yes</b> |
| Condition within 24      | Paired vs. Solitary | 0.481         | 2 | 3.353 | 0.023  | <b>Yes</b> |

*PMK*

| Comparisons for factor   | Comparison          | Diff of Means | p | q     | P      | P<0.050    |
|--------------------------|---------------------|---------------|---|-------|--------|------------|
| Sex                      | Males vs. Females   | 4.16          | 2 | 18.75 | <0.001 | <b>Yes</b> |
| Condition                | Solitary vs. Paired | 0.477         | 2 | 2.15  | 0.136  | No         |
| Time                     | 8.000 vs. 24.000    | 1.358         | 2 | 6.12  | <0.001 | <b>Yes</b> |
| Sex within Solitary-8h   | Males vs. Females   | 7.733         | 2 | 17.43 | <0.001 | <b>Yes</b> |
| Sex within Paired-8h     | Males vs. Females   | 2.915         | 2 | 6.57  | <0.001 | <b>Yes</b> |
| Condition within Males-8 | Solitary vs. Paired | 3.951         | 2 | 8.90  | <0.001 | <b>Yes</b> |
| Sex within 24            | Males vs. Females   | 2.995         | 2 | 9.55  | <0.001 | <b>Yes</b> |

*MDPC*

| Comparisons for factor   | Comparison          | Diff of Means | p | q     | P      | P<0.050    |
|--------------------------|---------------------|---------------|---|-------|--------|------------|
| Sex                      | Males vs. Females   | 0.837         | 2 | 7.401 | <0.001 | <b>Yes</b> |
| Condition                | Solitary vs. Paired | 0.781         | 2 | 6.903 | <0.001 | <b>Yes</b> |
| Time                     | 8.000 vs. 24.000    | 0.211         | 2 | 1.866 | 0.195  | NO         |
| Sex within Paired-8h     | Males vs. Females   | 2.444         | 2 | 10.8  | <0.001 | <b>Yes</b> |
| Condition within Males-8 | Solitary vs. Paired | 2.448         | 2 | 10.82 | <0.001 | <b>Yes</b> |

*IPPI*

| Comparisons for factor   | Comparison          | Diff of Means | p | q     | P      | P<0.050    |
|--------------------------|---------------------|---------------|---|-------|--------|------------|
| Sex                      | Males vs. Females   | 1.575         | 2 | 9.209 | <0.001 | <b>Yes</b> |
| Condition                | Paired vs. Solitary | 0.855         | 2 | 4.999 | 0.001  | <b>Yes</b> |
| Time                     | 8.000 vs. 24.000    | 0.331         | 2 | 1.932 | 0.18   | No         |
| Condition within Males   | Paired vs. Solitary | 1.517         | 2 | 6.269 | <0.001 | <b>Yes</b> |
| Condition within Females | Paired vs. Solitary | 0.194         | 2 | 0.801 | 0.574  | No         |
| Sex within Solitary      | Males vs. Females   | 0.914         | 2 | 3.778 | 0.011  | <b>Yes</b> |
| Sex within Paired        | Males vs. Females   | 2.237         | 2 | 9.246 | <0.001 | <b>Yes</b> |
| Time within Males        | 8.000 vs. 24.000    | 0.812         | 2 | 3.354 | 0.023  | <b>Yes</b> |
| Time within Females      | 8.000 vs. 24.000    | 0.15          | 2 | 0.622 | 0.663  | No         |
| Sex within 8             | Males vs. Females   | 2.056         | 2 | 8.5   | <0.001 | <b>Yes</b> |
| Sex within 24            | Males vs. Females   | 1.094         | 2 | 4.524 | 0.003  | <b>Yes</b> |
| Time within Solitary     | 8.000 vs. 24.000    | 0.223         | 2 | 0.921 | 0.519  | No         |
| Time within Paired       | 8.000 vs. 24.000    | 0.438         | 2 | 1.811 | 0.208  | No         |
| Condition within 8       | Paired vs. Solitary | 0.963         | 2 | 3.98  | 0.008  | <b>Yes</b> |
| Condition within 24      | Paired vs. Solitary | 0.748         | 2 | 3.09  | 0.035  | <b>Yes</b> |

*GPSS/FPPS*

| Comparisons for factor   | Comparison          | Diff of Means | p | q     | P      | P<0.050    |
|--------------------------|---------------------|---------------|---|-------|--------|------------|
| Sex                      | Males vs. Females   | 0.246         | 2 | 3.926 | 0.008  | <b>Yes</b> |
| Condition                | Solitary vs. Paired | 0.504         | 2 | 8.041 | <0.001 | <b>Yes</b> |
| Time                     | 8.000 vs. 24.000    | 0.212         | 2 | 3.389 | 0.021  | <b>Yes</b> |
| Sex within Paired-8h     | Males vs. Females   | 0.783         | 2 | 6.251 | <0.001 | <b>Yes</b> |
| Condition within Males-8 | Solitary vs. Paired | 0.71          | 2 | 5.668 | <0.001 | <b>Yes</b> |
| Condition within 24 h    | Solitary vs. Paired | 0.641         | 2 | 7.236 | <0.001 | <b>Yes</b> |

*GGPPS*

| Comparisons for factor   | Comparison          | Diff of Means | p | q     | P      | P<0.050    |
|--------------------------|---------------------|---------------|---|-------|--------|------------|
| Sex                      | Males vs. Females   | 0.103         | 2 | 0.636 | 0.655  | No         |
| Condition                | Paired vs. Solitary | 0.72          | 2 | 4.463 | 0.003  | <b>Yes</b> |
| Time                     | 8.000 vs. 24.000    | 0.329         | 2 | 2.039 | 0.157  | No         |
| Condition within Males   | Paired vs. Solitary | 0.438         | 2 | 1.919 | 0.183  | No         |
| Condition within Females | Paired vs. Solitary | 1.002         | 2 | 4.393 | 0.004  | <b>Yes</b> |
| Sex within Solitary      | Males vs. Females   | 0.385         | 2 | 1.687 | 0.24   | No         |
| Sex within Paired        | Males vs. Females   | 0.18          | 2 | 0.787 | 0.581  | No         |
| Time within Males        | 8.000 vs. 24.000    | 0.197         | 2 | 0.864 | 0.545  | No         |
| Time within Females      | 8.000 vs. 24.000    | 0.855         | 2 | 3.747 | 0.012  | <b>Yes</b> |
| Sex within 8             | Males vs. Females   | 0.423         | 2 | 1.855 | 0.197  | No         |
| Sex within 24            | Males vs. Females   | 0.629         | 2 | 2.755 | 0.059  | No         |
| Time within Solitary     | 8.000 vs. 24.000    | 0.187         | 2 | 0.818 | 0.567  | No         |
| Time within Paired       | 8.000 vs. 24.000    | 0.844         | 2 | 3.701 | 0.013  | <b>Yes</b> |
| Condition within 8       | Paired vs. Solitary | 1.236         | 2 | 5.415 | <0.001 | <b>Yes</b> |
| Condition within 24      | Paired vs. Solitary | 0.205         | 2 | 0.897 | 0.53   | No         |

**Table S5.** Primers designed for cloning and RT-qPCR analysis of MVA pathway genes in *D. rhizophagus*.

| Gene             | Primers sequences (5' → 3') |                                     | Location of amplicon & Amplicon length (bp) | Application                            | Annealing temperature (°C) & Extension time (s) |
|------------------|-----------------------------|-------------------------------------|---------------------------------------------|----------------------------------------|-------------------------------------------------|
| <i>AACT</i>      | F                           | GGC GAA TGC CTC CAC TTT G           | 834-893<br>60 bp                            | RT-qPCR<br>(Assay ID. AI6RPRP)         | 60 °C / 60 s                                    |
|                  | R                           | GCC GCT CTT GTG GTT AAA ATC AG      |                                             |                                        |                                                 |
|                  | P                           | CCG CAG CTC CGT CAT T               |                                             |                                        |                                                 |
| <i>HMGS</i>      | F                           | TGT TAC CAG CTT TAC TGC CAG AAG     | 667-733<br>67 bp                            | RT-qPCR<br>(Assay ID. AI70NXX)         | “                                               |
|                  | R                           | CAA ACG ACT CAA TAC TCA CAG GCT     |                                             |                                        |                                                 |
|                  | P                           | CTG CAA CAG CTT TTC C               |                                             |                                        |                                                 |
| <i>HMGR</i>      | F                           | CCA AGC TCC TTG AAA ACT TAC CTT TT  | 1382-1480<br>99 bp                          | RT-qPCR<br>(Assay ID. AI89L35)         | “                                               |
|                  | R                           | CCA CTG GTA TTG GCA TGT ATC CA      |                                             |                                        |                                                 |
|                  | P                           | CAC GCA CCC ATG ACC AA              |                                             |                                        |                                                 |
| <i>MK</i>        | F                           | GGT GTG TAC TTT TGG CAA TAT GGT     | 762-862<br>101 bp                           | RT-qPCR<br>(Assay ID. AIAA09Y)         | “                                               |
|                  | R                           | GCA CTT TGC TAT TTA CGA GCA GTA A   |                                             |                                        |                                                 |
|                  | P                           | CCG TCG TTC ATC TCT C               |                                             |                                        |                                                 |
| <i>PMK</i>       | F                           | ACT TGG AGT GAT GAA ATC AGA AAG GG  | 220-287<br>68 bp                            | RT-qPCR<br>(Assay ID. AIBJZF6)         | “                                               |
|                  | R                           | GCC GCT GAT TTG CAA GCT             |                                             |                                        |                                                 |
|                  | P                           | CCG GGC TAC TTT TGC A               |                                             |                                        |                                                 |
| <i>MDPC</i>      | F                           | GAC AGG GTT CTG GAA GTG CAT         | 413-476<br>64 bp                            | RT-qPCR<br>(Assay ID. AICSXME)         | “                                               |
|                  | R                           | TCA CCC TTG TGC CAT TGC A           |                                             |                                        |                                                 |
|                  | P                           | CCA ACC ACC ATA AAT AC              |                                             |                                        |                                                 |
| <i>IPPI</i>      | F                           | AGA CAG CAT TCC CAT TGA CAG TAT TAA | 432-520<br>89 bp                            | RT-qPCR<br>(Assay ID. AID1VSM)         | “                                               |
|                  | TT                          |                                     |                                             |                                        |                                                 |
|                  | R                           | CGA TCT CAT GCT CGC CAT ATT TG      |                                             |                                        |                                                 |
| <i>GPPS/FPPS</i> | P                           | CCG TTC CCT TGG TCT TT              | 910-978<br>69 bp                            | RT-qPCR<br>(Assay ID. AIFATYU)         | “                                               |
|                  | F                           | GCC AAA ACG ATC CTG ATG GAA ATG     |                                             |                                        |                                                 |
|                  | R                           | GCC GAA GCA ATC CAG AAA ATC G       |                                             |                                        |                                                 |
| <i>GGPPS</i>     | P                           | TTG AAT CTG GAA AAA CTG             | 417-491<br>75 bp                            | RT-qPCR<br>(Assay ID. AIGJR42)         | “                                               |
|                  | F                           | CAC CTG TCC CTC TGA GGA AGA         |                                             |                                        |                                                 |
|                  | R                           | CTG ATG GCC AGC ATG AAC AAC         |                                             |                                        |                                                 |
| <i>CYP4G55v1</i> | P                           | CCG CCC GTT TTT CGA G               | 688-768<br>81 bp                            | RT-qPCR<br>(Assay ID. AIS065U)<br>[40] | “                                               |
|                  | F                           | GACTATGCAATGGCTGTGATGAAG            |                                             |                                        |                                                 |
|                  | R                           | GATGTAGTCGGAGTAAAGCCAGATT           |                                             |                                        |                                                 |
| <i>AACT</i>      | P                           | CTGTGCGACATTCTC                     | 1340 bp                                     | cDNA cloning                           | 61 °C / 80 s                                    |
|                  | F                           | AAC ATT TAG ACT CAG CTA TTG GG      |                                             |                                        |                                                 |
|                  | R                           | ACA ACT ACT CGA ACA TGA ACG C       |                                             |                                        |                                                 |
| <i>HMGS</i>      | F                           | ATG AGT GCC TGG CCT GAA GAT GTG     | 1374 bp                                     | cDNA cloning                           | 66 °C / 85 s                                    |
|                  | R                           | CTA TGA GTG GCC GTT GGT GAT CAT     |                                             |                                        |                                                 |
|                  | P                           |                                     |                                             |                                        |                                                 |
| <i>HMGR</i>      | F1                          | GGA ATA ACT TGG ATA TTC TCA TCT G   | 500 bp                                      | cDNA cloning                           | 60 °C / 35 s                                    |
|                  | R1                          | GTG TCT CTA CCA GTG TAT CTA AAG     |                                             |                                        |                                                 |
|                  | F2                          | GCT CAA TTC GCT CTT AAT GGG G       | 1155 bp                                     |                                        | 58 °C / 75 s                                    |
|                  | R2                          | AGC TCT ACA TCC TCT ATT AGT GC      |                                             |                                        |                                                 |
|                  | F3                          | GCT TCT GGA TGG TCG TGA GTT GTA     | 991 bp                                      |                                        | 60 °C / 60 s                                    |
|                  | R3                          | TAA GGT AGT GGA TCG GTT GTG C       |                                             |                                        |                                                 |
|                  | F4                          | ATA GGT GGA TTC AAC GCT CAT GCT G   | 400 bp                                      |                                        | 60 °C / 35 s                                    |
|                  | R4                          | GCT ACA TTT TTA AGC ATT GTC TTG GC  |                                             |                                        |                                                 |
|                  | F                           | GCA AAC TTT AAC TAC CAA GCA GTG     | 1350 bp                                     | cDNA cloning                           | 64 °C / 85 s                                    |
|                  | R                           | TTA ATC AAC TCT AAC CCC TGG AC      |                                             |                                        |                                                 |
| <i>PMK</i>       | F                           | GCG AAA TTA AGA ATC AGT AAT ACC T   | 511 bp                                      | cDNA cloning                           | 62 °C / 40 s                                    |
|                  | R                           | AAA TCG TCT AGG TCG CAT TCG         |                                             |                                        |                                                 |
|                  | P                           | CTG GTA AAG ACT TCA TTT GTG AG      |                                             |                                        |                                                 |
| <i>MDPC</i>      | R                           | CTA TAT TGT GCC GCC ACC AAA GG      | 550 bp                                      |                                        | 62 °C / 40 s                                    |
|                  | F                           | ATT CCT AAA GTA GCG AGT TGT G       |                                             |                                        |                                                 |
|                  | R                           | GCA CCG TTC ATC AGT TTG ACT TCA     |                                             |                                        |                                                 |
| <i>IPPI</i>      | F                           | GTT TAT CAG TGG ACC ATT GTG CTG     | 1200 bp                                     | cDNA cloning                           | 61 °C / 75 s                                    |
|                  | R                           | GTT CTT AAA CAT AGA TGA CTA GCA G   |                                             |                                        |                                                 |
|                  | P                           |                                     |                                             |                                        |                                                 |
| <i>GPPS/FPPS</i> | F                           | ATG TTT TCG ATG AAA ATG TGC CGC     | 1100 bp                                     | cDNA cloning                           | 59 °C / 65 s                                    |
|                  | R                           | TCC CTA AGG AGC TTC TAA CAC TCG     |                                             |                                        |                                                 |
|                  | P                           |                                     |                                             |                                        |                                                 |
| <i>GGPPS</i>     | F                           | ACC ACA AAA CCT TTC CCA AAT T       | 1290 bp                                     | cDNA cloning                           | 63 °C / 80 s                                    |
|                  | R                           | TTC CTG GAA TTA TTA CAA GAA CTT     |                                             |                                        |                                                 |
|                  | P                           |                                     |                                             |                                        |                                                 |
|                  | F                           |                                     | 1000 bp                                     | cDNA cloning                           | 56 °C / 60 s                                    |
|                  | R                           |                                     |                                             |                                        |                                                 |
|                  | P                           |                                     |                                             |                                        |                                                 |

\*F: Forward, R: Reverse, P: TaqMan™ Probe.

**Table S6.** Minimum Information for Publication of Quantitative Real-Time PCR Experiments (MIQE) checklist.

| Item to check                                                         | Details                                                                                                                         |
|-----------------------------------------------------------------------|---------------------------------------------------------------------------------------------------------------------------------|
| <b>Experimental design</b>                                            |                                                                                                                                 |
| Definition of experimental and control groups                         | yes, included in the manuscript                                                                                                 |
| Number within each group                                              | yes, included in the manuscript                                                                                                 |
| Assay carried out by the core or investigator's laboratory?           | yes, all experiments were performed in our laboratory                                                                           |
| Acknowledgment of authors' contributions                              | yes, included in the manuscript                                                                                                 |
| <b>Sample</b>                                                         |                                                                                                                                 |
| Description                                                           | yes, included in the manuscript                                                                                                 |
| Volume/mass of sample processed                                       | yes, included in the manuscript                                                                                                 |
| Microdissection or macrodissection                                    | yes, included in the manuscript                                                                                                 |
| Processing procedure                                                  | yes, included in the manuscript                                                                                                 |
| If frozen, how and how quickly?                                       | this does not apply                                                                                                             |
| If fixed, with what and how quickly?                                  | this does not apply                                                                                                             |
| Sample storage conditions and duration (especially for FFPEb samples) | this does not apply                                                                                                             |
| <b>Nucleic acid extraction</b>                                        |                                                                                                                                 |
| Procedure and/or instrumentation                                      | yes, we followed the manufacturer's protocol without modification                                                               |
| Name of kit and details of any modifications                          | yes, included in the manuscript. We used a commercial RiboPure™ kit (Ambion by Life Technologies, Cat. No. AM1924)              |
| Source of additional reagents used                                    | this does not apply, as we did not used any other additional reagent                                                            |
| Details of DNase or RNase treatment                                   | we did not performed DNase or RNase treatment                                                                                   |
| Contamination assessment (DNA or RNA)                                 | this was evaluated by means of A <sub>260</sub> /A <sub>280</sub> absorbance                                                    |
| <b>Nucleic acid quantification</b>                                    |                                                                                                                                 |
| Instrument and method                                                 | yes, this is included in the manuscript                                                                                         |
| Purity (A <sub>260</sub> /A <sub>280</sub> )                          | yes, this was evaluated                                                                                                         |
| Yield                                                                 | yes, we described the yield estimation in the manuscript                                                                        |
| RNA integrity: method/instrument                                      | yes, we described the yield estimation in the manuscript                                                                        |
| RIN/RQI or Cq of 3' and 5' transcripts                                | this was not evaluated                                                                                                          |
| Electrophoresis traces                                                | yes, included in the manuscript                                                                                                 |
| Inhibition testing (Cq dilutions, spike, or other)                    | this was not evaluated                                                                                                          |
| <b>Reverse transcription</b>                                          |                                                                                                                                 |
| Complete reaction conditions                                          | yes, we followed all manufacturer's protocols with no single modification                                                       |
| Amount of RNA and reaction volume                                     | yes, included in the manuscript                                                                                                 |
| Priming oligonucleotide (if using GSP) and concentration              | this does not apply                                                                                                             |
| Reverse transcriptase and concentration                               | the information is not provided by the manufacturer                                                                             |
| Temperature and time                                                  | we followed manufacturer's protocol: 37°C for 60 minutes and 95°C for 5 minutes                                                 |
| Manufacturer of reagents and catalogue numbers                        | yes, included in the manuscript. We used a commercial High Capacity RNA to cDNA kit (Applied Biosystems, USA; Cat. No. 4387406) |
| Cq's with and without reverse transcription                           | this was not evaluated                                                                                                          |
| Storage conditions of cDNA                                            | yes, included in the manuscript                                                                                                 |
| <b>qPCR target information</b>                                        |                                                                                                                                 |
| Gene symbol                                                           | yes, included in the manuscript                                                                                                 |
| Sequence accession number                                             | yes, included in the manuscript                                                                                                 |
| Location of amplicon                                                  | yes, included in the supplementary data                                                                                         |
| Amplicon length                                                       | yes, included in the supplementary data                                                                                         |
| In silico specificity screen (BLAST, and so on)                       | yes, this was done by the manufacturer (Applied Biosystems)                                                                     |
| Pseudogenes, retropseudogenes, or other homologs?                     | does not apply                                                                                                                  |
| Sequence alignment                                                    | yes, this was done by the manufacturer (Applied Biosystems)                                                                     |
| Secondary structure analysis of amplicon                              | yes, this was done by the manufacturer (Applied Biosystems)                                                                     |
| Location of each primer by exon or intron (if applicable)             | does not apply                                                                                                                  |
| What splice variants are targeted?                                    | does not apply                                                                                                                  |
| <b>qPCR oligonucleotides</b>                                          |                                                                                                                                 |
| Primer sequences                                                      | yes, included in the supplementary data                                                                                         |
| RTPrimerDB identification number                                      | does not apply                                                                                                                  |
| Probe sequences                                                       | yes, included in the supplementary data                                                                                         |
| Location and identity of any modifications                            | does not apply                                                                                                                  |
| Manufacturer of oligonucleotides                                      | yes, included in the manuscript                                                                                                 |

|                                                                          |                                                                                                                                                                                                                                                           |
|--------------------------------------------------------------------------|-----------------------------------------------------------------------------------------------------------------------------------------------------------------------------------------------------------------------------------------------------------|
| Purification method                                                      | the information provided by the manufacturer indicates that oligonucleotides are purified via Transgenomic Wave HPLC. The method is proprietary                                                                                                           |
| <b>qPCR protocol</b>                                                     |                                                                                                                                                                                                                                                           |
| Complete reaction conditions                                             | yes, included in the manuscript                                                                                                                                                                                                                           |
| Reaction volume and amount of cDNA/DNA                                   | yes, included in the manuscript                                                                                                                                                                                                                           |
| Primer, (probe), Mg <sup>2+</sup> , and dNTP concentrations              | yes, concentration of the primers and probe are in the manuscript; however, the concentration of the master mix is not provided by the manufacturer                                                                                                       |
| Polymerase identity and concentration                                    | AmpliAq Gold® DNA polymerase, UP; dNTPs with dUTP; ROX™ passive reference; optimized buffer components.                                                                                                                                                   |
| Buffer/kit identity and manufacturer                                     | this is included along with the PCR master mix II (Cat No. 4427788), but the information is not provided by the manufacturer                                                                                                                              |
| Exact chemical composition of the buffer                                 | this is included along with the PCR master mix II (Cat No. 4427788), but the information is not provided by the manufacturer                                                                                                                              |
| Additives (SYBR Green I, DMSO, and so forth)                             | does not apply                                                                                                                                                                                                                                            |
| Manufacturer of plates/tubes and catalog number                          | only 48-well plates were used (MicroAmp™, Cat. No.4375816) and optical adhesive film (MicroAmp™, Cat. No. 4375928) (Applied Biosystems, USA)                                                                                                              |
| Complete thermocycling parameters                                        | yes, included in the manuscript                                                                                                                                                                                                                           |
| Reaction setup (manual/robotic)                                          | manual                                                                                                                                                                                                                                                    |
| Manufacturer of qPCR instrument                                          | yes, included in the manuscript                                                                                                                                                                                                                           |
| <b>qPCR validation</b>                                                   |                                                                                                                                                                                                                                                           |
| Evidence of optimization (from gradients)                                | yes, available upon request                                                                                                                                                                                                                               |
| Specificity (gel, sequence, melt, or digest)                             | yes, this is described in the manuscript                                                                                                                                                                                                                  |
| For SYBR Green I, C <sub>q</sub> of the NTC                              | does not apply                                                                                                                                                                                                                                            |
| Calibration curves with slope and y intercept                            | yes, available upon request                                                                                                                                                                                                                               |
| PCR efficiency calculated from slope                                     | yes, available upon request                                                                                                                                                                                                                               |
| CIs for PCR efficiency or SE                                             | yes, available upon request                                                                                                                                                                                                                               |
| r <sup>2</sup> of calibration curve                                      | yes, this is described in the manuscript                                                                                                                                                                                                                  |
| Linear dynamic range                                                     | yes, they are available upon request                                                                                                                                                                                                                      |
| C <sub>q</sub> variation at LOD                                          | this does not apply                                                                                                                                                                                                                                       |
| CIs throughout range                                                     | yes, available upon request                                                                                                                                                                                                                               |
| Evidence for LOD                                                         | this does not apply                                                                                                                                                                                                                                       |
| If multiplex, efficiency and LOD of each assay                           | this does not apply                                                                                                                                                                                                                                       |
| <b>Data analysis</b>                                                     |                                                                                                                                                                                                                                                           |
| qPCR analysis program (source, version)                                  | yes, included in the manuscript.                                                                                                                                                                                                                          |
| Method of C <sub>q</sub> determination                                   | C <sub>q</sub> is determined by the StepOne™ Software v2.3 in the geometric phase where the standard deviation between replicates is minor                                                                                                                |
| Outlier identification and disposition                                   | Outliers were automatically identified by the qPCR instrument software. Once this, they were eliminated from the analysis. However, when only one out of three group replicates were eliminated, the remaining two were subsequently used in the analysis |
| Results for NTCs                                                         | yes, this was not reported                                                                                                                                                                                                                                |
| Justification of number and choice of reference genes                    | does not apply                                                                                                                                                                                                                                            |
| Description of normalization method                                      | yes, included in the manuscript                                                                                                                                                                                                                           |
| Number and concordance of biological replicates                          | yes, included in the manuscript                                                                                                                                                                                                                           |
| Number and stage (reverse transcription or qPCR) of technical replicates | yes, included in the manuscript                                                                                                                                                                                                                           |
| Repeatability (intraassay variation)                                     | yes, we estimated this as SD for the C <sub>q</sub> variance and are available upon request                                                                                                                                                               |
| Reproducibility (interassay variation, CV)                               | does not apply                                                                                                                                                                                                                                            |
| Power analysis                                                           | this was not evaluated                                                                                                                                                                                                                                    |
| Statistical methods for results significance                             | yes, included in the manuscript                                                                                                                                                                                                                           |
| Software (source, version)                                               | yes, included in the manuscript. The program used for the analysis was SigmaStat v. 3.5.                                                                                                                                                                  |
| C <sub>q</sub> or raw data submission with RDML                          | this was not reported                                                                                                                                                                                                                                     |
